# Supplementary material for: Study the Performance of Bi 2 S 3 ‑Based Solar Cells with various Electron Transport Layers: A Numerical Investigation using DFT and SCAPS-1D
Source: Research Square preprint supplement (doi:10.21203/rs.3.rs-6738949/v1), 2025-06-02
Supplement: Supplementary file 1 [file 0ac5e2369d43721e32fae2f8.docx]

Supplementary Material for:

Study the Performance of Bi2S3**‑**Based Solar Cells with various Electron Transport Layers: A Numerical Investigation using DFT and SCAPS-1D

Vishvas Kumar

Department of Electronics and communication Engineering, SRM Institute of Science and Technology, Kattankulathur - 603203,Tamil Nadu, India

*Corresponding author: Vishvas Kumar


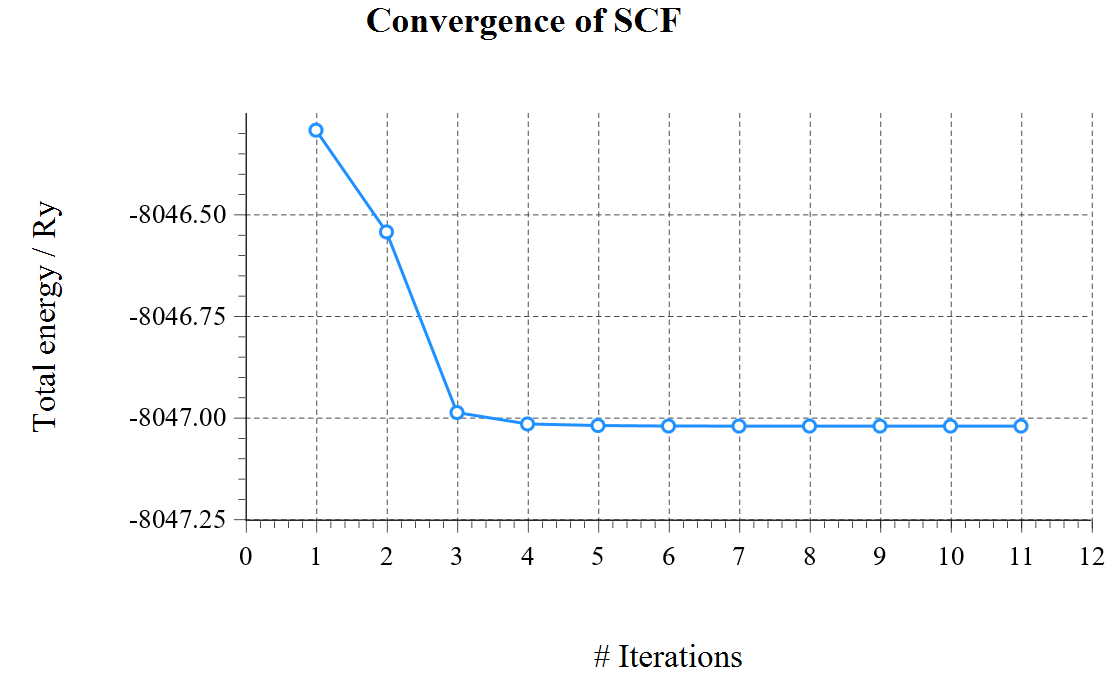


Fig. S1 SCF convergence of Bi2S3


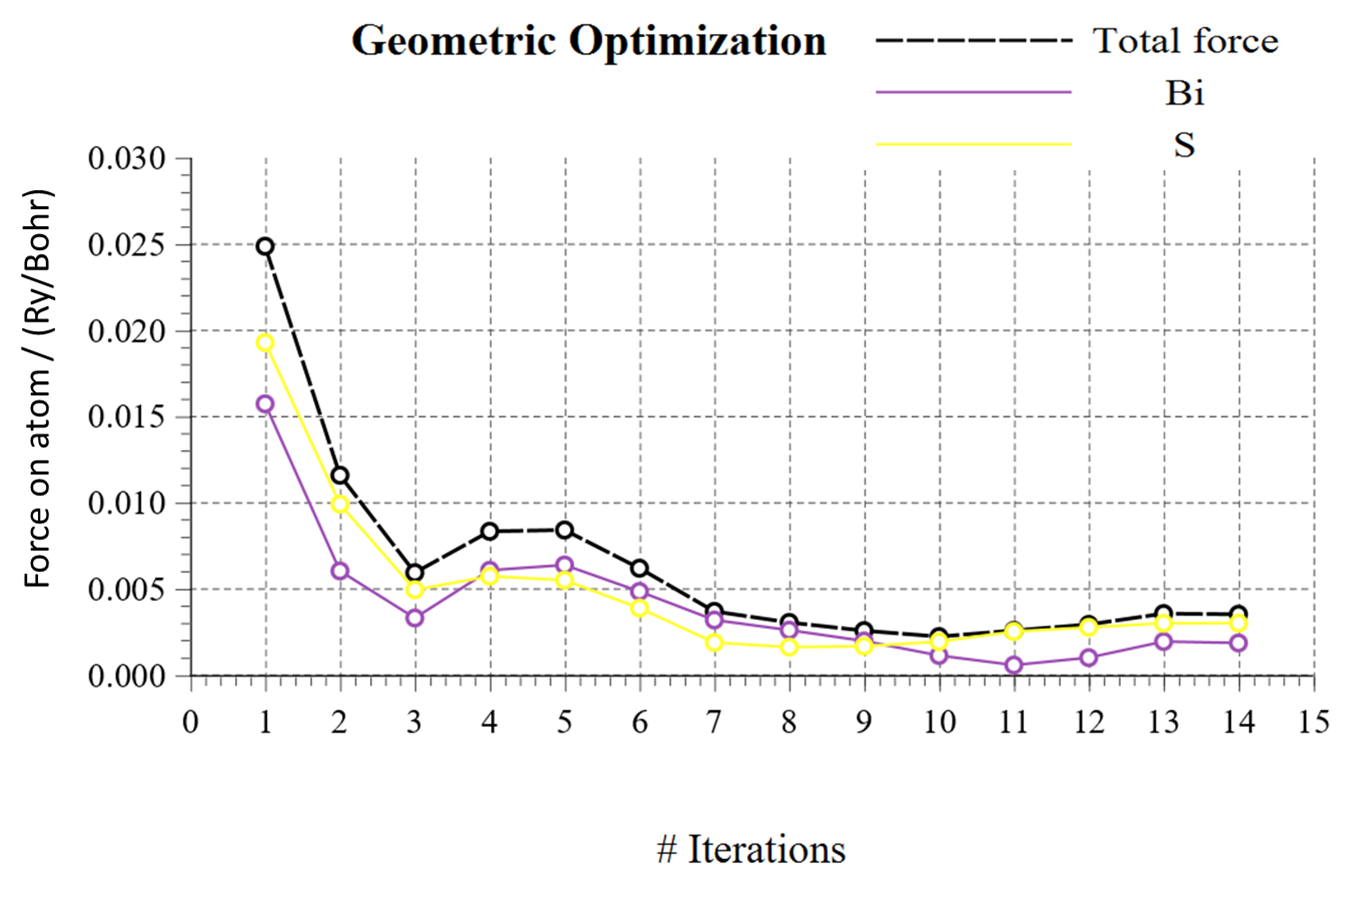


Fig. S2 Force on atom / (Ry/Bohr) convergence of Bi2S3


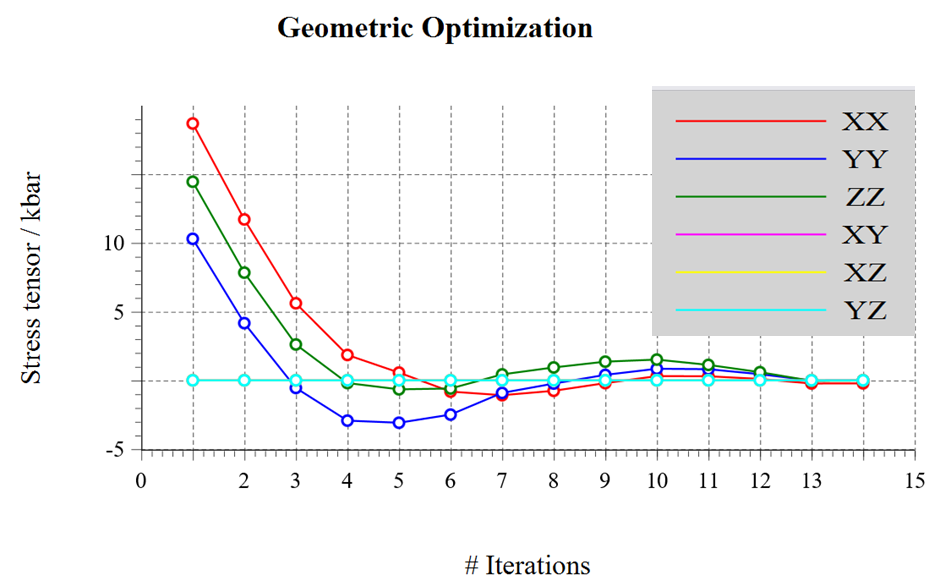


Fig. S3 Stress tensor / kbar convergence of Bi2S3


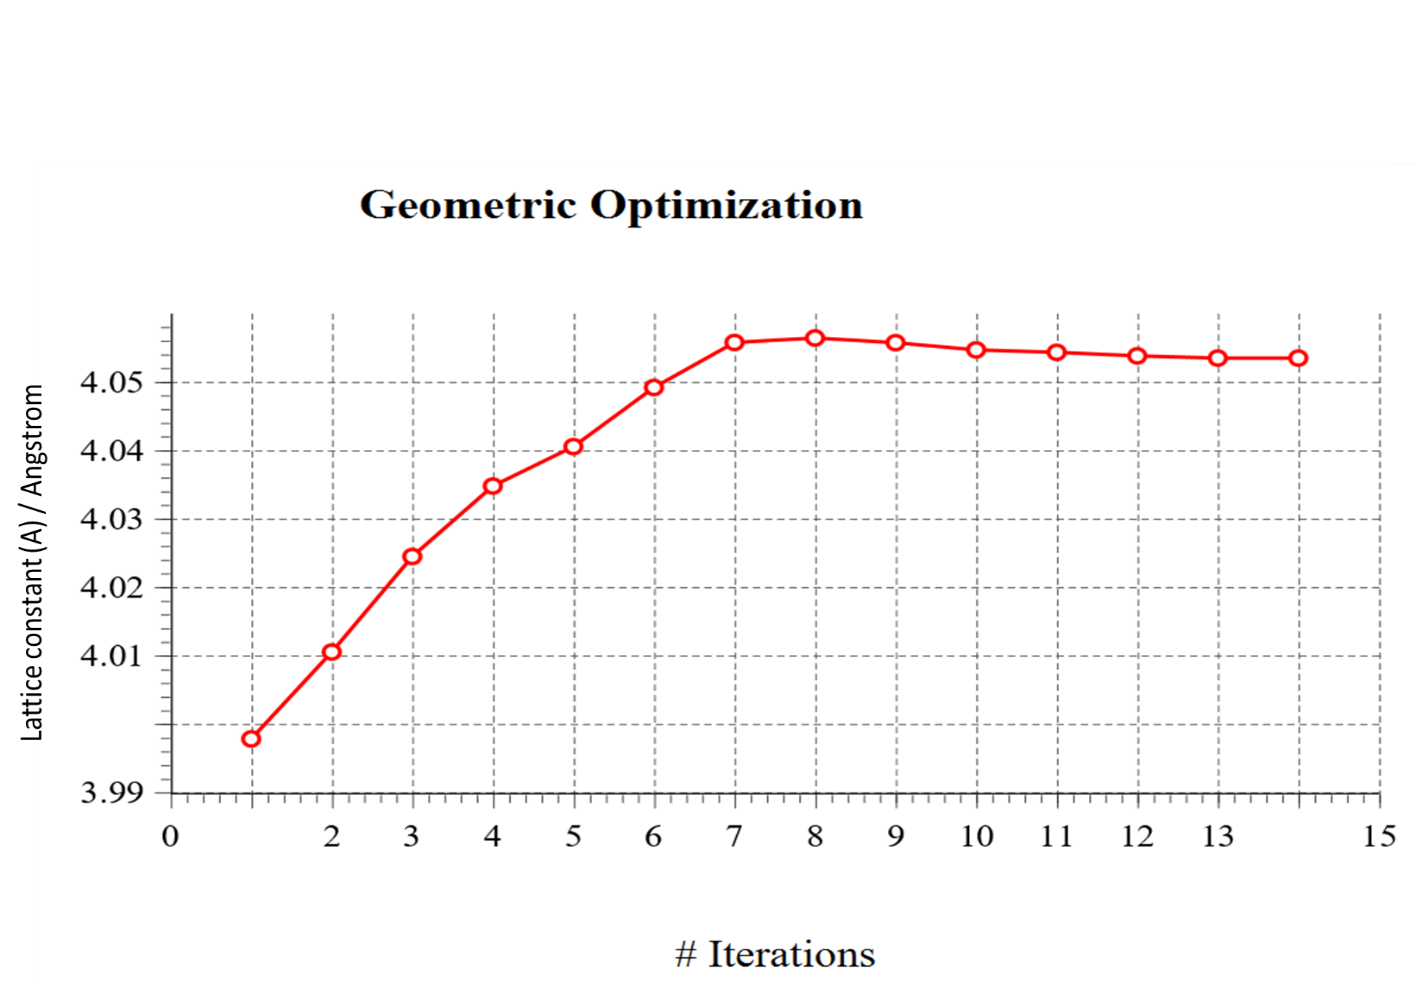


Fig. S4 Lattice constant (A) / Angstrom convergence of Bi2S3


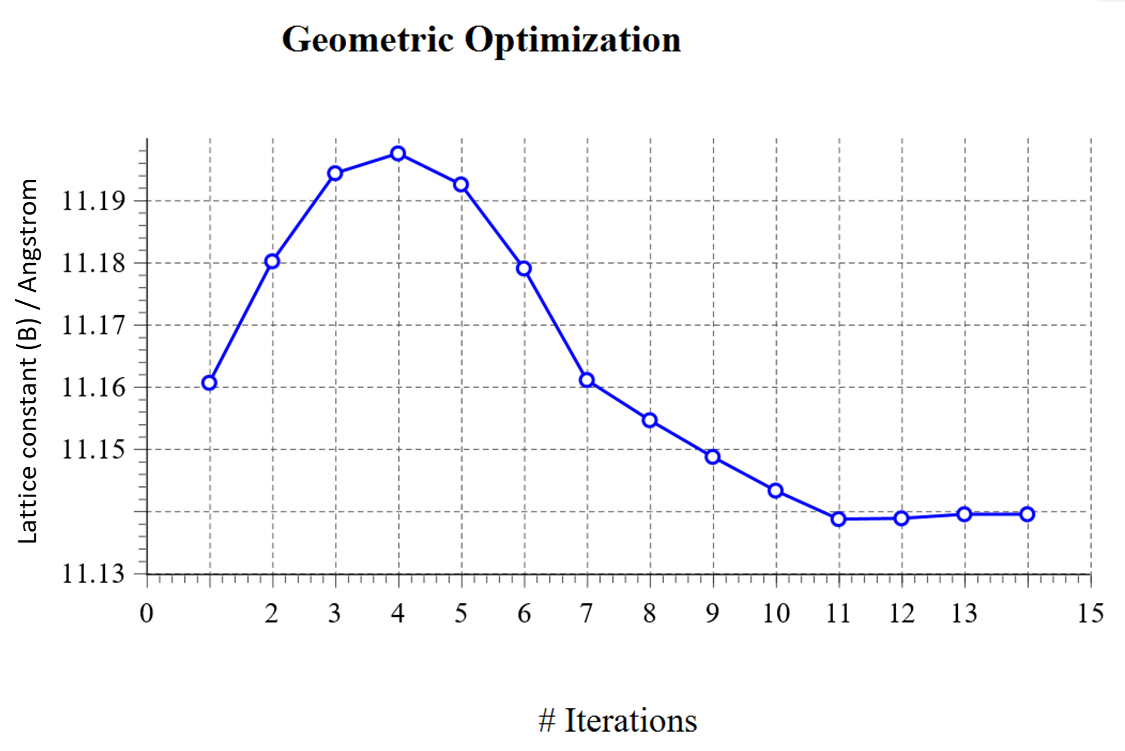


Fig. S5 Lattice constant (B) / Angstrom convergence of Bi2S3


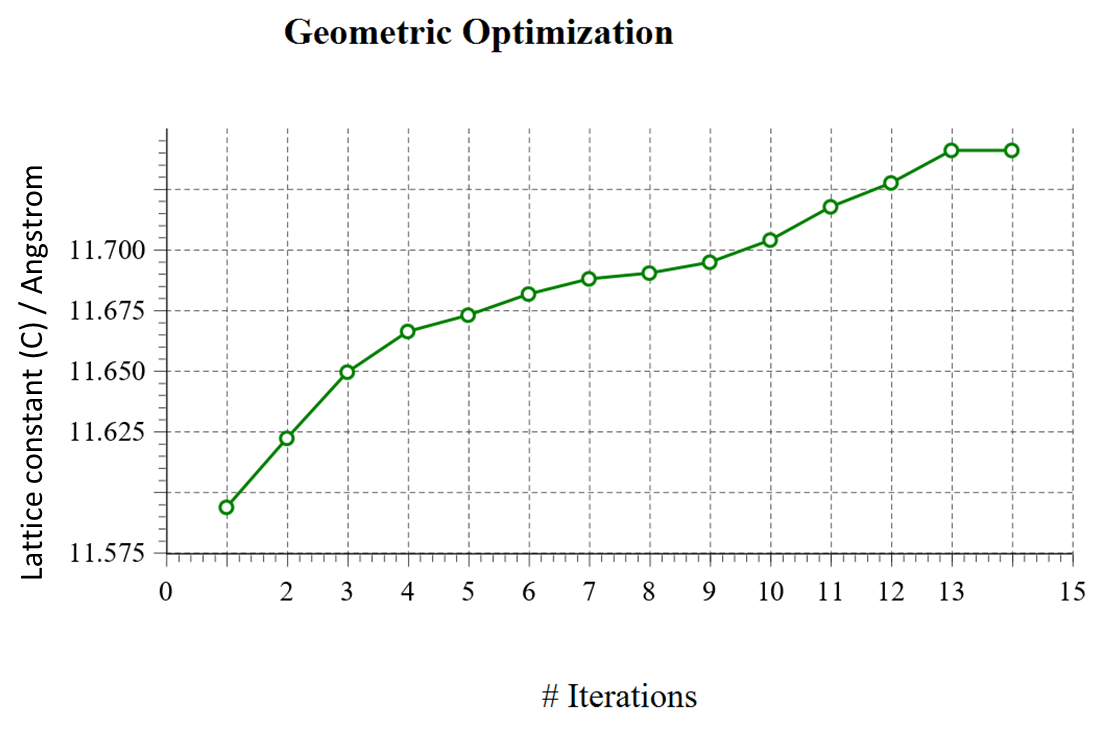


Fig. S6 Lattice constant (C) / Angstrom convergence of Bi2S3
